# Supplementary material for: An eHealth Project on Invasive Pneumococcal Disease: Comprehensive Evaluation of a Promotional Campaign
Source: PubMed Central journal article supplement (PMC5161781; doi:10.2196/jmir.6205), 2016-12-02
Supplement: jmir_v18i12e316_app1.pdf [file jmir_v18i12e316_app1.pdf]

Multimedia Appendix 1. Final multivariable linear models to predict MARS mean subscale scores.

| <b>Subscale</b>    | <b>Predictor</b>                          | <b><i>b</i> (SE)</b>      | <b><i> t </i> (<i>P</i>)</b> | <b><i>R</i><sup>2</sup></b> |
|--------------------|-------------------------------------------|---------------------------|------------------------------|-----------------------------|
| Engagement         | Intercept                                 | 4.17 (0.15)               | 28.31 (<.001)                | .17                         |
|                    | Sex (females vs males)                    | -0.02 (0.06)              | 0.27 (.79)                   |                             |
|                    | Age                                       | -0.43 (0.28) <sup>a</sup> | 1.56 (.12)                   |                             |
|                    | Profession (healthcare vs non-healthcare) | -0.89 (0.20)              | 4.40 (<.001)                 |                             |
|                    | Age x profession                          | 1.61 (0.53) <sup>a</sup>  | 3.06 (.003)                  |                             |
| Functionality      | Intercept                                 | 4.53 (0.16)               | 29.17 (<.001)                | .06                         |
|                    | Sex (females vs males)                    | -0.03 (0.09)              | 0.29 (.77)                   |                             |
|                    | Age                                       | -0.36 (0.33) <sup>a</sup> | 1.10 (.27)                   |                             |
|                    | Profession (healthcare vs non-healthcare) | -0.68 (0.24)              | 2.80 (.01)                   |                             |
|                    | Age x profession                          | 1.36 (0.64) <sup>a</sup>  | 2.13 (.04)                   |                             |
| Aesthetics         | Intercept                                 | 4.22 (0.19)               | 21.71 (<.001)                | .11                         |
|                    | Sex (females vs males)                    | -0.03 (0.09)              | 0.33 (.74)                   |                             |
|                    | Age                                       | -0.43 (0.36) <sup>a</sup> | 1.20 (.23)                   |                             |
|                    | Profession (healthcare vs non-healthcare) | -0.85 (0.26)              | 3.20 (.002)                  |                             |
|                    | Age x profession                          | 1.48 (0.67) <sup>a</sup>  | 2.19 (.03)                   |                             |
| Information        | Intercept                                 | 4.27 (0.14)               | 29.85 (<.001)                | .16                         |
|                    | Sex (females vs males)                    | -0.01 (0.08)              | 0.11 (.92)                   |                             |
|                    | Age                                       | 0.31 (0.31) <sup>a</sup>  | 1.00 (.32)                   |                             |
|                    | Profession (healthcare vs non-healthcare) | -0.68 (0.23)              | 3.01 (.003)                  |                             |
|                    | Age x profession                          | 0.99 (0.60) <sup>a</sup>  | 1.65 (.10)                   |                             |
| Subjective quality | Intercept                                 | 3.74 (0.27)               | 13.81 (<.001)                | .17                         |
|                    | Sex (females vs males)                    | 0.09 (0.11)               | 0.75 (.45)                   |                             |
|                    | Age                                       | -0.69 (0.48) <sup>a</sup> | 1.44 (.15)                   |                             |
|                    | Profession (healthcare vs non-healthcare) | -1.46 (0.34)              | 4.28 (<.001)                 |                             |
|                    | Age x profession                          | 2.64 (0.85)               | 3.09 (.002)                  |                             |

<sup>a</sup>Estimates are multiplied by 100
